# Supplementary material
Source: HighWire-hosted journal article supplement (https://hw-f5-jim.highwire.org/content/65/6/964)

Supplementary Figure 1. Forest plot of estimated odds ratio (95% confidence intervals) for unadjusted (panel A) or fully adjusted (panel B) venous thromboembolism (VTE) of testosterone treatment (TTh) vs placebo, as derived from available pharmacoepidemiological studies. Panel C: forest plot of estimated odds ratio (95% confidence intervals) for fully adjusted VTE when events derived from the first six month of TTh in the Martinez et al., (63) study were considered. LL=lower limits; UP= upper limits.

A

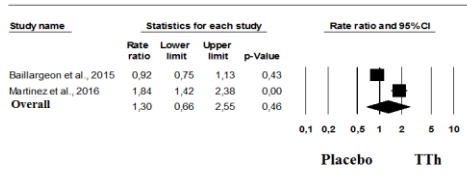

B

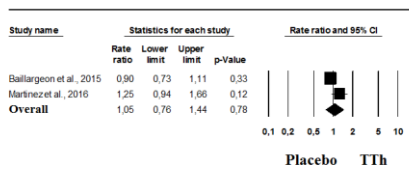

C

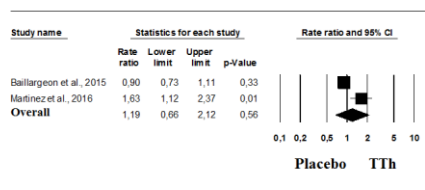

Supplement: inline-supplementary-material-1 [file inline-supplementary-material-1.pdf]
